# Supplementary material for: Dog Breeds and Body Conformations with Predisposition to Osteosarcoma in the UK: A Case-Control Study
Source: Research Square preprint supplement (doi:10.21203/rs.3.rs-88529/v1), 2020-10-14
Supplement: Supplementary file 1 [file 9f07b930b24189dfa3fd516f.xlsx]

## Sheet: Table 1 - Univariable
Variable	P-Value for Variable	Category	Case No. (%)	Non-case No. (%)	OR	95% CI	P-value for Category
Purebred Status	<0.001	Crossbred	370 (21.1)	245889 (27.2)	Base
		Purebred	1359 (77.4)	655266 (72.4)	1.38	1.23 - 1.55	<0.001
		Purebred_Unrecorded	27 (1.5)	4056 (0.4)	4.42	2.99 - 6.55	<0.001
Breed	< 0.001	Crossbreed	300 (17.1)	197549 (21.8)	Base
		Rhodesian Ridgeback	29 (1.7)	1495 (0.2)	12.77	8.70 - 18.76	<0.001
		Rottweiler	139 (7.9)	7223 (0.8)	12.67	10.35 - 15.52	<0.001
		Greyhound (Unspecified)	103 (5.9)	5511 (0.6)	12.31	9.82 - 15.42	<0.001
		Great Dane	19 (1.1)	1258 (0.1)	9.95	6.23 - 15.86	<0.001
		German Pointer	21 (1.2)	1578 (0.2)	8.76	5.61 - 13.68	<0.001
		Mastiff (Unspecified)	35 (2.0)	3096 (0.3)	7.44	5.24 - 10.58	<0.001
		Pinscher (Unspecified)	29 (1.7)	2566 (0.3)	7.44	5.07 - 10.92	<0.001
		Lurcher	53 (3.0)	6016 (0.7)	5.8	4.33 - 7.78	<0.001
		Breed not recorded	27 (1.5)	4061 (0.4)	4.38	2.95 - 6.50	<0.001
		Golden Retriever	65 (3.7)	9785 (1.1)	4.37	3.34 - 5.72	<0.001
		Collie (Unspecified)	13 (0.7)	1983 (0.2)	4.32	2.47 - 7.54	<0.001
		Fox Terrier	5 (0.3)	1013 (0.1)	3.25	1.34 - 7.88	0.009
		Weimaraner	11 (0.6)	2414 (0.3)	3	1.64 - 5.48	<0.001
		Standard Poodle	5 (0.3)	1128 (0.1)	2.92	1.20 - 7.08	0.018
		Labrador Retriever	260 (14.8)	59925 (6.6)	2.86	2.42 - 3.37	<0.001
		Akita (Unspecified)	8 (0.5)	2037 (0.2)	2.59	1.28 - 5.23	0.008
		Poodle (Unspecified)	4 (0.2)	1050 (0.1)	2.51	0.93 - 6.74	0.068
		Boxer	35 (2.0)	9438 (1.0)	2.44	1.72 - 3.47	<0.001
		Scottish Terrier	5 (0.3)	1455 (0.2)	2.26	0.93 - 5.48	0.071
		German Shepherd Dog	65 (3.7)	21360 (2.4)	2	1.53 - 2.62	<0.001
		Tibetan Terrier	5 (0.3)	1870 (0.2)	1.76	0.73 - 4.27	0.21
		Hungarian Vizsla	5 (0.3)	1976 (0.2)	1.67	0.69 - 4.04	0.258
		American Bulldog	8 (0.5)	3225 (0.4)	1.63	0.81 - 3.3	0.171
		Cairn Terrier	6 (0.3)	2470 (0.3)	1.6	0.71 - 3.59	0.255
		Dogue de Bordeaux	7 (0.4)	3030 (0.3)	1.52	0.72 - 3.22	0.273
		Labradoodle	17 (1.0)	7595 (0.8)	1.47	0.90 - 2.40	0.12
		Alaskan Malamute	4 (0.2)	1915 (0.2)	1.38	0.51 - 3.69	0.527
		Dalmatian	5 (0.3)	2720 (0.3)	1.21	0.50 - 2.93	0.672
		English Springer Spaniel	30 (1.7)	20198 (2.2)	0.98	0.67 - 1.42	0.908
		Whippet	7 (0.4)	4684 ( 0.5)	0.98	0.46 - 2.08	0.967
		Border Collie	29 (1.7)	22403 (2.5)	0.85	0.58 - 1.25	0.412
		Bulldog (Unspecified)	4 (0.2)	3232 (0.4)	0.81	0.30 - 2.19	0.685
		Staffordshire Bull Terrier	63 (3.6)	53934 (6.0)	0.77	0.59 - 1.01	0.058
		Other Purebred	223 (12.7)	206227 (22.8)	0.71	0.60 - 0.85	<0.001
		West Highland White Terrier	20 (1.1)	18875 (2.1)	0.7	0.44 - 1.10	0.119
		Cocker Spaniel	25 (1.4)	33073 (3.7)	0.5	0.33 - 0.75	0.001
		Beagle	6 (0.3)	8070 (0.9)	0.49	0.22 - 1.10	0.083
		Jack Russell Terrier	33 (1.9)	48569 (5.4)	0.45	0.31 - 0.64	<0.001
		Border Terrier	6 (0.3)	9651 (1.1)	0.41	0.18 - 0.92	0.03
		Bichon Frise	7 (0.4)	13268 (1.5)	0.35	0.16 - 0.74	0.006
		Husky	4 (0.2)	8524 (0.9)	0.31	0.12 - 0.83	0.02
		Cavalier King Charles Spaniel	7 (0.4)	17257 (1.9)	0.27	0.13 - 0.57	0.001
		French Bulldog	4 (0.2)	16397 (1.8)	0.16	0.06 - 0.43	<0.001
		Shar-Pei	NA (NA)	3647 (0.4)
		Cavachon	NA (NA)	3535 (0.4)
		Maltese	NA (NA)	3248 (0.4)
		Cavapoo	NA (NA)	4035 (0.4)
		Cockapoo	NA (NA)	18260 (2.0)
		King Charles Spaniel	NA (NA)	2813 (0.3)
		Sprocker	NA (NA)	3338 (0.4)
		Miniature Poodle	NA (NA)	2415 (0.3)
		Boston Terrier	NA (NA)	1799 (0.2)
		Chow Chow	NA (NA)	1002 (0.1)
		Dachshund (Unspecified)	NA (NA)	1692 (0.2)
		Goldendoodle	NA (NA)	1128 (0.1)
		Jackapoo	NA (NA)	1362 (0.2)
		Jug	NA (NA)	1967 (0.2)
		Miniature Yorkshire Terrier	NA (NA)	1560 (0.2)
		Puggle	NA (NA)	1173 (0.1)
		Standard Dachshund	NA (NA)	1133 (0.1)
KC Breed Group	<0.001	Toy	26 (1.5)	131897 (14.6)	Base
		Gundog	484 (27.6)	135606 (15.0)	18.11	12.20 - 26.87	<0.001
		Hound	164 (9.3)	31364 (3.5)	26.53	17.54 - 40.13	<0.001
		Not KC Recognised	390 (22.2)	263616 (29.1)	7.51	5.05 - 11.16	<0.001
		Pastoral	144 (8.2)	51675 (5.7)	14.14	9.31 - 21.47	<0.001
		Terrier	153 (8.7)	145828 (16.1)	5.32	3.51 - 8.07	<0.001
		Utility	46 (2.6)	102627 (11.3)	2.27	1.41 - 3.68	0.001
Body mass (kg)	<0.001	<10	89 (5.1)	213321 (23.6)	Base
		10-19.9	435 (24.8)	167774 (18.5)	6.21	4.95 - 7.81	<0.001
		20-29.9	392 (22.3)	117620 (13.0)	7.99	6.35 - 10.06	<0.001
		30-39.9	522 (29.7)	69856 (7.7)	17.91	14.30 - 22.43	<0.001
		>40	231 (13.2)	26178 (2.9)	21.15	16.56 - 27.02	<0.001
		Bodymass Unrecorded	87 (5.0)	310462 (34.3)	0.67	0.50 - 0.90	0.008
Age (y)	<0.001	<3	101 (5.8)	329270 (36.4)	Base
		3 to <6	204 (11.6)	223344 (24.7)	2.98	2.35 - 3.78	<0.001
		6 to <9	589 (33.5)	162000 (17.9)	11.85	9.60 - 14.64	<0.001
		9 to <12	589 (33.5)	108448 (12.0)	17.71	14.34 - 21.87	<0.001
		>12	188 (10.7)	69726 (7.7)	8.79	6.90 - 11.20	<0.001
		Age Unrecorded	85 (4.8)	12423 (1.4)	22.31	16.71 - 29.78	<0.001
Sex/Neuter Status	<0.001	Female Entire	41 (2.3)	233772 (25.8)	Base
		Female Neutered	507 (28.9)	197768 (21.8)	14.62	10.63 - 20.10	<0.001
		Male Entire	59 (3.4)	259460 (28.7)	1.3	0.87 - 1.93	0.202
		Male Neutered	574 (32.7)	209982 (23.2)	15.59	11.35 - 21.4	<0.001
		Sex Unrecorded	575 (32.7)	4229 (0.5)	775.24	563.91 - 1065.77	<0.001
Dachshund Status	<0.001	Non-Dachshund-type	1426 (81.2)	696999 (77.0)	Base
		Dachshund-type	3 (0.2)	10288 (1.1)	0.14	0.05 - 0.44	0.001
		Dachshund Status Unrecorded	327 (18.6)	197924 (21.9)	0.81	0.72 - 0.91	<0.001
Spaniel Status	<0.001	Non-Spaniel-type	1360 (77.4)	630349 (69.6)	Base
		Spaniel-type	69 (3.9)	76938 (8.5)	0.42	0.33 - 0.53	<0.001
		Spaniel Status Unrecorded	327 (18.6)	197924 (21.9)	0.77	0.68 - 0.86	<0.001
Chondrodystrophy Status		Non-Chondrodystriphic	1165 (66.3)	290490 (32.1)	Base
		Chondrodystrophic	165 (9.4)	331858 (36.7)	0.12	0.11 - 0.15	<0.001
		Chondrodystrophy Unrecorded	426 (24.3)	282863 (31.2)	0.38	0.34 - 0.42	<0.001
Skull Shape	<0.001	Mesocephalic	982 (55.9)	452296 (50.0)	Base
		Brachycephalic	106 ( 6.0)	166883 (18.4)	0.29	0.24 - 0.36	<0.001
		Dolichocephalic	341 (19.4)	75770 (8.4)	2.07	1.83 - 2.35	<0.001
		Skull Shape Unrecorded	327 (18.6)	210262 (23.2)	0.72	0.63 - 0.81	<0.001

## Sheet: Table 2A- Multivariable Breed
Variable	Variable P-value	Category	OR	95% CI	Category P-value
Breed	<0.001	Crossbreed	Base
		Rottweiler	13.3	10.55 - 16.75	<0.001
		Rhodesian Ridgeback	11.31	7.37 - 17.35	<0.001
		Great Dane	10.03	5.81 - 17.32	<0.001
		Mastiff (Unspecified)	9.09	6.06 - 13.63	<0.001
		German Pointer	8.84	5.43 - 14.41	<0.001
		Pinscher (Unspecified)	7.19	4.65 - 11.12	<0.001
		Greyhound (Unspecified)	6.98	5.46 - 8.93	<0.001
		Lurcher	4.94	3.57 - 6.83	<0.001
		Collie (Unspecified)	3.74	1.99 - 7.03	<0.001
		Golden Retriever	3.7	2.77 - 4.94	<0.001
		Akita (Unspecified)	2.92	1.32 - 6.47	0.008
		American Bulldog	2.67	1.28 - 5.59	0.009
		Labrador Retriever	2.64	2.22 - 3.15	<0.001
		Poodle (Unspecified)	2.48	0.87 - 7.00	0.088
		Boxer	2.23	1.55 - 3.22	<0.001
		Standard Poodle	2.23	0.87 - 5.72	0.096
		Weimaraner	2.03	1.06 - 3.90	0.034
		German Shepherd Dog	1.96	1.47 - 2.62	<0.001
		Dogue de Bordeaux	1.95	0.88 - 4.33	0.1
		Fox Terrier	1.75	0.64 - 4.74	0.274
		Labradoodle	1.62	0.97 - 2.72	0.066
		Hungarian Vizsla	1.52	0.58 - 3.99	0.395
		Scottish Terrier	1.33	0.51 - 3.45	0.563
		Cairn Terrier	1.24	0.55 - 2.84	0.603
		Alaskan Malamute	1.23	0.44 - 3.47	0.695
		Tibetan Terrier	1.22	0.47 - 3.12	0.684
		Bulldog (Unspecified)	1.17	0.42 - 3.27	0.758
		Whippet	1.1	0.50 - 2.40	0.814
		Dalmatian	1	0.40 - 2.52	0.993
		English Springer Spaniel	0.89	0.60 - 1.31	0.541
		Border Collie	0.82	0.55 - 1.22	0.324
		Other Purebred	0.78	0.65 - 0.93	0.006
		Staffordshire Bull Terrier	0.74	0.56 - 0.98	0.033
		Beagle	0.66	0.29 - 1.51	0.328
		Breed not recorded	0.52	0.34 - 0.80	0.003
		Cocker Spaniel	0.51	0.34 - 0.78	0.002
		West Highland White Terrier	0.5	0.32 - 0.80	0.004
		Husky	0.43	0.16 - 1.17	0.097
		Jack Russell Terrier	0.38	0.26 - 0.54	<0.001
		Border Terrier	0.35	0.16 - 0.81	0.013
		Bichon Frise	0.3	0.14 - 0.64	0.002
		French Bulldog	0.3	0.11 - 0.83	0.02
		Cavalier King Charles Spaniel	0.21	0.10 - 0.46	<0.001
		Cockapoo	NA (0 cases)
		Boston Terrier
		Cavachon
		Cavapoo
		Chow Chow
		Dachshund (Unspecified)
		Goldendoodle
		Jackapoo
		Jug
		King Charles Spaniel
		Maltese
		Miniature Poodle
		Miniature Yorkshire Terrier
		Puggle
		Shar-Pei
		Sprocker
		Standard Dachshund
Sex/Neuter status	<0.001	Female Entire	Base
		Female Neutered	7.95	5.78 - 10.94	<0.001
		Male Entire	1.17	0.79 - 1.74	0.441
		Male Neutered	9.39	6.83 - 12.91	<0.001
		Sex/Neuter unrecorded	1188.3	855.25 - 1651.04	<0.001
Age (Y)	<0.001	<3	Base
		3 to <6	3.64	2.82 - 4.70	<0.001
		6 to <9	13.3	10.54 - 16.79	<0.001
		9 to <12	18.44	14.59 - 23.30	<0.001
		>12	9.4	7.23 - 12.23	<0.001
		Age Unrecorded	2.22	1.62 - 3.05	<0.001

## Sheet: Table 2B Multi Breed-Related
Variable	Variable P-value	Category	OR	95% CI	Category P-value
Purebred status	<0.001	Crossbred	Base
		Purebred	1.25	1.11 - 1.41	<0.001
		Unrecorded	0.48	0.31 - 0.74	0.001
KC Breed Group	<0.001	Toy	Base
		Gundog	14.48	9.72 - 21.58	<0.001
		Hound	21.54	14.14 - 32.81	<0.001
		Not_KC_Recognised	7.1	4.75 - 10.59	<0.001
		Pastoral	11.22	7.33 - 17.15	<0.001
		Terrier	3.87	2.54 - 5.90	<0.001
		Unrecorded	27.39	18.24 - 41.13	<0.001
		Utility	2.42	1.49 - 3.94	<0.001
Body mass (kg)	<0.001	<10	Base
		10-19.9	5.91	4.66 - 7.50	<0.001
		20-29.9	7.31	5.75 - 9.30	<0.001
		30-39.9	15.82	12.49 - 20.05	<0.001
		>40	18.07	13.87 - 23.53	<0.001
		Unrecorded	0.15	0.10 - 0.22	<0.001
Dachshund status	<0.001	Non-Dachshund type	Base
		Dachshund type	0.15	0.05 - 0.46	0.001
		Unrecorded	0.7	0.61 - 0.79	<0.001
Spaniel status	<0.001	Non-Spaniel type	Base
		Spaniel type	0.37	0.29 - 0.47	<0.001
		Unrecorded	0.65	0.57 - 0.74	<0.001
Chondrodystrophy status	<0.001	Non-chondrodystrophic	Base
		Chondrodystrophic	0.13	0.11 - 0.16	<0.001
		Unrecorded	0.4	0.36 - 0.45	<0.001
Skull shape	<0.001	Mesocephalic	Base
		Brachycephalic	0.39	0.32 - 0.48	<0.001
		Dolichocephalic	1.92	1.68 - 2.19	<0.001
		Unrecorded	0.68	0.60 - 0.78	<0.001

## Sheet: S1 Breed Terms 
Venom breed term	Final Breed Term
Afghan Hound	Afghan Hound
African Wild Dog	African Wild Dog
Africanis	Africanis
Aidi	Aidi
Airedale Terrier	Airedale Terrier
Akita	Akita (Unspecified)
American Akita	Akita (Unspecified)
Japanese Inu Akita	Akita (Unspecified)
Alapaha Blue Blood Bulldog	Alapaha Blue Blood Bulldog
Alaskan Malamute	Alaskan Malamute
American Bulldog	American Bulldog
ASCOB Cocker Spaniel	American Cocker Spaniel
American Dingo	American Dingo
American Bull Terrier	American Pit Bull Terrier
American Pit Bull Terrier	American Pit Bull Terrier
North American Shepherd Dog	American Shepherd Dog
Andalusian Mouse-Hunting Dog	Andalusian Mouse-Hunting Dog
Australian Bandog	Australian Bandog
Australian Kelpie	Australian Kelpie
Australian Shepherd Dog	Australian Shepherd Dog
Australian Silky Terrier	Australian Silky Terrier
Australian Terrier	Australian Terrier
Azawakh Hound	Azawakh Hound
Balla Terrier	Balla Terrier
Basenji	Basenji
Basset Griffon Vendeen	Basset Griffon Vendeen
Griffon Briquet Vendeen	Basset Griffon Vendeen
Basset - Unspecified	Basset Hound
Basset Hound	Basset Hound
Bleu de Gascogne Basset	Bleu de Gascogne Basset
Fauve de Bretagne Basset	Fauve de Bretagne Basset
French Basset	French Basset
Beagle	Beagle
English Beagle	Beagle
Bearded Collie	Bearded Collie
Bedlington Terrier	Bedlington Terrier
Belgian Groenendael Shepherd Dog	Belgian Shepherd
Belgian Malinois Shepherd Dog	Belgian Shepherd
Belgian Shepherd	Belgian Shepherd
Belgian Tervuren Shepherd Dog	Belgian Shepherd
Belgrade Terrier	Belgrade Terrier
Bichon Frise	Bichon Frise
Biewer Terrier	Biewer Terrier
Black Russian Terrier	Black Russian Terrier
Blue Lacy	Blue Lacy
Border Collie	Border Collie
Border Terrier	Border Terrier
Borzoi	Borzoi
Russian Hound	Borzoi
Bosnian Hound	Bosnian Hound
Boston Terrier	Boston Terrier
Bouvier des Ardennes	Bouvier des Ardennes
Bouvier des Flandres	Bouvier des Flandres
Boxer	Boxer
German Boxer	Boxer
Brazilian Terrier	Brazilian Terrier
#N/A	Breed Not Recorded
Breed not recorded	Breed Not Recorded
Briard	Briard
British Bulldog	British Bulldog
Bull Arab	Bull Arab
Bull Terrier	Bull Terrier (Unspecified)
Australian Bulldog	Australian Bulldog
Aylestone Bulldog	Aylestone Bulldog
Banter Bulldogge	Banter Bulldogge
Bulldog	Bulldog (Unspecified)
Catahoula Bulldog	Catahoula Bulldog
Dorset Olde Tyme Bulldogge	Dorset Olde Tyme Bulldogge
Olde Boston Bulldogge	Olde Boston Bulldogge
Spanish Bulldog	Spanish Bulldog
Sussex Bulldog	Sussex Bulldog
Cairn Terrier	Cairn Terrier
Canaan Dog	Canaan Dog
Appenzell Cattle Dog	Cattle Dog (Unspecified)
Australian Cattle Dog	Cattle Dog (Unspecified)
Blue Cattle Dog	Cattle Dog (Unspecified)
Cattle Dog	Cattle Dog (Unspecified)
Entlebuch Cattle Dog	Cattle Dog (Unspecified)
Portuguese Cattle Dog	Cattle Dog (Unspecified)
Swedish Cattle Dog	Cattle Dog (Unspecified)
Ovtcharka	Caucasian Shepherd Dog
Cavachon	Cavachon
Cavalier King Charles Spaniel	Cavalier King Charles Spaniel
Cavapoo	Cavapoo
Cavadoodle	Cavapoo
Chesapeake Bay Retriever	Chesapeake Bay Retriever
Chihuahua	Chihuahua
Long-Haired Chihuahua	Chihuahua
Short-Haired Chihuahua	Chihuahua
Chinese Chongqing Dog	Chinese Chongqing Dog
Chinese Crested	Chinese Crested
Hairless Chinese Crested	Chinese Crested
Powder Puff Chinese Crested	Chinese Crested
Chow Chow	Chow Chow
Cirneco Dell 'Etna	Cirneco Dell 'Etna
American Cockapoo	Cockapoo
Cockapoo	Cockapoo
American Cocker Spaniel	American Cocker Spaniel
Cocker Spaniel	Cocker Spaniel
English Cocker Spaniel	Cocker Spaniel
Working Cocker Spaniel	Working Cocker Spaniel
Part-Colour Cocker Spaniel	Cocker Spaniel
Welsh Cocker Spaniel	Welsh Cocker Spaniel
Collie	Collie (Unspecified)
Farm Collie	Collie (Unspecified)
German Collie	Collie (Unspecified)
New Zealand Border Collie	Collie (Unspecified)
Black and Tan Coonhound	Coonhound
Bluetick Coonhound	Coonhound
Coonhound	Coonhound
Coton De Tulear	Coton De Tulear
Cretan Hound	Cretan Hound
American Lamalese	Crossbreed
Beaglier	Crossbreed
Bichonpoo	Crossbreed
Bolonoodle	Crossbreed
Borgi	Crossbreed
Borkie	Crossbreed
Boxador	Crossbreed
Boxoodle	Crossbreed
Bug	Crossbreed
Bull Boxer	Crossbreed
Bullador	Crossbreed
Cavachi	Crossbreed
Cavador	Crossbreed
Cavajack	Crossbreed
Cavapom	Crossbreed
Cavapoochon	Crossbreed
Cavatzu	Crossbreed
Chi-Poo	Crossbreed
Chichon	Crossbreed
Chippiparai	Crossbreed
Chiweenie	Crossbreed
Chonzer	Crossbreed
Chorkie	Crossbreed
Chug	Crossbreed
Chusky	Crossbreed
Cockador	Crossbreed
Cockalier	Crossbreed
Cockashon	Crossbreed
Cockatzu	Crossbreed
Cockerdale	Crossbreed
Combai	Crossbreed
Crestepoo	Crossbreed
Crossbreed	Crossbreed
Dalmador	Crossbreed
Dashapoo	Crossbreed
Daxijack	Crossbreed
Dorgi	Crossbreed
German Sheeppoodle	Crossbreed
Goldador	Crossbreed
Griffoodle	Crossbreed
Groodle	Crossbreed
Harrier Beagle	Crossbreed
Havachon	Crossbreed
Havamalt	Crossbreed
Havapoo	Crossbreed
Havaton	Crossbreed
Huskamute	Crossbreed
Jackabea	Crossbreed
Jackachau	Crossbreed
Jackachi	Crossbreed
Jackalier	Crossbreed
Jackarainian	Crossbreed
Jackashit	Crossbreed
Jatese	Crossbreed
Jorky	Crossbreed
Kyi-Leo	Crossbreed
La-Chon	Crossbreed
Labracollie	Crossbreed
Labradinger	Crossbreed
Labrador Husky	Crossbreed
Labraspoodle	Crossbreed
Lha-Cocker	Crossbreed
Lhasalier	Crossbreed
Lhasapoo	Crossbreed
Lhatese	Crossbreed
Malkie	Crossbreed
Malshi	Crossbreed
Malt Russell	Crossbreed
Maltalier	Crossbreed
Malti-Poo	Crossbreed
Maltichon	Crossbreed
Miniature Cockapoo	Crossbreed
Miniature Goldendoodle	Crossbreed
Miniature Labradoodle	Crossbreed
Miniature Schnoodle	Crossbreed
Morki	Crossbreed
Papastzu	Crossbreed
Papichon	Crossbreed
Papipoo	Crossbreed
Papitese	Crossbreed
PatterJack	Crossbreed
PatterPoo	Crossbreed
Pekepoo	Crossbreed
Pomapoo	Crossbreed
Pomapug	Crossbreed
Pomchi	Crossbreed
Pomchon	Crossbreed
Pomeagle	Crossbreed
Pomsky	Crossbreed
Poo-Ton	Crossbreed
Poochon	Crossbreed
Poogle	Crossbreed
Porgie	Crossbreed
Porkie	Crossbreed
Pugador	Crossbreed
Pugalier	Crossbreed
Puganese	Crossbreed
Pugapoo	Crossbreed
Pugland	Crossbreed
Pugpom	Crossbreed
PugTzu	Crossbreed
Schnauzon	Crossbreed
Schnoodle	Crossbreed
Schnorky	Crossbreed
Schoodle	Crossbreed
Sharanian	Crossbreed
Sharbull	Crossbreed
Sharpador	Crossbreed
Sheepadoodle	Crossbreed
Shepador	Crossbreed
ShiChi	Crossbreed
Shichon	Crossbreed
Shikoku	Crossbreed
Shiranian	Crossbreed
Shorkie	Crossbreed
Shug	Crossbreed
Smoodle	Crossbreed
Spanador	Crossbreed
Spanish Meztizo	Crossbreed
Springabat	Crossbreed
Springador	Crossbreed
Sprockapoo	Crossbreed
Sprollie	Crossbreed
Wauzer	Crossbreed
Weechon	Crossbreed
Weimerdoodle	Crossbreed
Westichon	Crossbreed
Westidoodle	Crossbreed
Westipoo	Crossbreed
Yo-Chon	Crossbreed
Yoodle	Crossbreed
Yorkiedoodle	Crossbreed
Yorkiepoo	Crossbreed
Leopard Cur	Cur (Unspecified)
Mountain Cur	Cur (Unspecified)
Southern Blackmouth Cur	Cur (Unspecified)
Cyprus Poodle	Cyprus Poodle
Cyprus Terrier	Cyprus Terrier
Czesky Terrier	Czesky Terrier
Alpine Dachsbracke	Dachsbracke
Dachsbracke	Dachsbracke
Dachshund	Dachshund (Unspecified)
Teckel Dachshund	Dachshund (Unspecified)
Dalmatian	Dalmatian
Dandie Dinmont Terrier	Dandie Dinmont Terrier
Danish-Swedish Farm Dog	Danish-Swedish Farm Dog
Dogo Argentino	Dogo Argentino
Dogue Brasileiro	Dogue Brasileiro
Dogue de Bordeaux	Dogue de Bordeaux
Dutch Partridge Dog	Dutch Partridge Dog
Dutch Tulip Hound	Dutch Tulip Hound
English Bull Terrier	English Bull Terrier
English Terrier	English Terrier
Black Fell Terrier	Fell Terrier
Fell Terrier	Fell Terrier
Red Fell Terrier	Fell Terrier
Finnish Lapphund	Finnish Lapphund
Fox Terrier	Fox Terrier
Smooth Fox Terrier	Fox Terrier
Wire-Haired Fox Terrier	Fox Terrier
French Bulldog	French Bulldog
German Guard Dog	German Guard Dog
German Hunting Terrier	German Hunting Terrier
Jagdterrier	German Hunting Terrier
German Shepherd Dog	German Shepherd Dog
German Shepherd Dog - White	German Shepherd Dog
Giant German Spitz	Giant German Spitz
Giant Schnauzer	Giant Schnauzer
Grand Anglo-Français Tricolore	Grand Anglo-Français Tricolore
Grand Griffon Bleu de Gascogne	Grand Griffon Bleu de Gascogne
Grand Griffon Vendeen	Grand Griffon Vendeen
King Shepherd Dog	King Shepherd Dog
Glen of Imaal Terrier	Glen of Imaal Terrier
Golden Retriever	Golden Retriever
Goldendoodle	Goldendoodle
Grand Basset Griffon Vendeen	Grand Basset Griffon Vendeen
Great Dane	Great Dane
Greek Hound	Greek Hound
Banjara Greyhound	Banjara Greyhound
English Greyhound	Greyhound (Unspecified)
Greyhound	Greyhound (Unspecified)
Hungarian Greyhound	Hungarian Greyhound
Italian Greyhound	Italian Greyhound
Polish Greyhound	Polish Greyhound
Spanish Greyhound	Spanish Greyhound
French Korthals Pointing Wire-Haired Griffon	Griffon
Griffon	Griffon
Griffon Bleu de Gascogne	Griffon
Griffon Boulet	Griffon
Griffon Nivernais	Griffon
Wire-Haired Pointing Griffon	Griffon
Griffon Bruxellois	Griffon
African Sand Dog	African Sand Dog
American Crested Sand Terrier	American Crested Sand Terrier
American Hairless Terrier	American Hairless Terrier
Mexican Hairless	Mexican Hairless
Mexican Hairless - Intermediate	Mexican Hairless
Peruvian Hairless	Mexican Hairless
Standard Mexican Hairless	Mexican Hairless
Havanese	Havanese
Hokkaido	Hokkaido
Tamaskan Husky	Huksy
Hungarian Kuvasz	Hungarian Kuvasz
Hungarian Mudi	Hungarian Mudi
Hungarian Pumi	Hungarian Pumi
Hungarian Vizsla	Hungarian Vizsla
Wire-Haired Hungarian Vizsla	Hungarian Vizsla
American Blue Gascon Hound	American Blue Gascon Hound
American Foxhound	American Foxhound
Anglos-Francaises de Petite Venerie	Anglos-Francaises de Petite Venerie
Bavarian Mountain Hound	Bavarian Mountain Hound
Bernese Hound	Bernese Hound
Bloodhound	Bloodhound
Bracco Italiano	Bracco Italiano
Braque Francais	Braque Francais
Braque Saint-Germain	Braque Saint-Germain
English Foxhound	English Foxhound
Foxhound	Foxhound
French Hound	French Hound
German Hound	German Hound
Greek Hunting Dog	Greek Hunting Dog
Hamilton Hound	Hamilton Hound
Hanoverian Hound	Hanoverian Hound
Harrier Hound	Harrier Hound
Hound	Hound
Istrian Short-Haired Hound	Istrian Short-Haired Hound
Norwegian Dunker Hound	Norwegian Dunker Hound
Plott Hound	Plott Hound
Posavina Hound	Posavina Hound
Serbian Balkan Hound	Serbian Balkan Hound
Spanish Hound	Spanish Hound
Trail Hound	Trail Hound
Transylvanian Hound	Transylvanian Hound
Alaskan Husky	Husky
Husky	Husky
Siberian Husky	Husky
Standard Alaskan Husky	Husky
Ibizan Hound	Ibizan Hound
Japanese Shiba Inu	Inu Dog
Sanshu Dog	Inu Dog
Canadian Inuit Dog	Inuit Dog
Inuit Dog	Inuit Dog
Northern Inuit Dog	Inuit Dog
Standard American Inuit Dog	Inuit Dog
Irish Red and White Setter	Irish Setter
Irish Red Setter	Irish Setter
Irish Terrier	Irish Terrier
Italian Spinone	Italian Spinone
Jack Russell Terrier	Jack Russell Terrier
Wirehaired Jack Russell Terrier	Jack Russell Terrier
Jackal	Jackal
Jackadoodle	Jackapoo
Jackapoo	Jackapoo
Japanese Chin	Japanese Chin
Japanese Tosa	Japanese Tosa
Jug	Jug
Kai Dog	Kai Dog
Keeshond	Keeshond
Kerry Blue Terrier	Kerry Blue Terrier
King Charles Spaniel	King Charles Spaniel
Komondor	Komondor
Kooiker Dog	Kooiker Dog
Korean Jindo	Korean Jindo
Kromfohrländer	Kromfohrländer
Taigan	Kyrgyzdyn Taighany
Australian Labradoodle	Labradoodle
Labradoodle	Labradoodle
Labradoodle - Irish	Labradoodle
Labrador Retriever	Labrador Retriever
Lagotto Romagnolo	Lagotto Romagnolo
Lakeland Terrier	Lakeland Terrier
Lancashire Heeler	Lancashire Heeler
Leonberger	Leonberger
Lhasa Apso	Lhasa Apso
Lowchen	Lowchen
Lucas Terrier	Lucas Terrier
Lurcher	Lurcher
Maltese	Maltese
Manchester Terrier	Manchester Terrier
African Boerboel	Mastiff (Unspecified)
Alentejo Mastiff	Mastiff (Unspecified)
American Bandogge Mastiff	Mastiff (Unspecified)
American Mastiff	Mastiff (Unspecified)
Belgian Mastiff	Mastiff (Unspecified)
Bull Mastiff	Mastiff (Unspecified)
Bully Kuttas	Mastiff (Unspecified)
English Mastiff	Mastiff (Unspecified)
Italian Mastiff	Mastiff (Unspecified)
Kumaon Mastiff	Mastiff (Unspecified)
Mallorquin Mastiff	Mastiff (Unspecified)
Mastiff	Mastiff (Unspecified)
Neopolitan Mastiff	Mastiff (Unspecified)
Old English Mastiff	Mastiff (Unspecified)
Puerto Rican Mastiff	Mastiff (Unspecified)
Pyrenean Mastiff	Mastiff (Unspecified)
Spanish Mastiff	Mastiff (Unspecified)
Tibetan Mastiff	Mastiff (Unspecified)
Meliteo Kinidio	Meliteo Kinidio
Mi-Ki	Mi-Ki
Middle Asian Ovtcharka	Middle Asian Ovtcharka
American Miniature Shepherd Dog	American Miniature Shepherd Dog
American Pocket Bully	American Pocket Bully
Australian Miniature Shepherd Dog	Australian Miniature Shepherd Dog
Bolognese Bichon	Bolognese Bichon
Mini-Pei	Mini-Pei
Miniature Alaskan Husky	Miniature Alaskan Husky
Miniature American Inuit Dog	Miniature American Inuit Dog
Miniature Bull Terrier	Miniature Bull Terrier
Miniature Bulldog	Miniature Bulldog
Miniature Coloured Bull Terrier	Miniature Coloured Bull Terrier
Miniature English Bull Terrier	Miniature English Bull Terrier
Miniature Fox Terrier	Miniature Fox Terrier
Miniature German Spitz	Miniature German Spitz
Miniature Staffordshire Terrier	Miniature Staffordshire Terrier
Miniture Shih-Tzu	Miniature Shih-Tzu
Munsterlander Small Pointer	Munsterlander Small Pointer
Petit Basset Griffon Vendeen	Petit Basset Griffon Vendeen
Pocket Beagle	Pocket Beagle
Miniature Dachshund	Miniature Dachshund
Miniature Long-Haired Dachshund	Miniature Dachshund
Miniature Smooth-Haired Dachshund	Miniature Dachshund
Miniature Wire-Haired Dachshund	Miniature Dachshund
Miniature Jack Russell Terrier	Miniature Jack Russell Terrier
Affenpinscher	Affenpinscher
Miniature Doberman Pinscher	Miniature Doberman Pinscher
Miniature Pinscher	Miniature Pinscher
Miniature Poodle	Miniature Poodle
Miniature Schnauzer	Miniature Schnauzer
Miniature Yorkshire Terrier	Miniature Yorkshire Terrier
Bernese Mountain Dog	Mountain Dog (Unspecified)
Caucasian Mountain Dog	Mountain Dog (Unspecified)
Estrela Mountain Dog	Mountain Dog (Unspecified)
Formosan Mountain Dog	Mountain Dog (Unspecified)
Greater Swiss Mountain Dog	Mountain Dog (Unspecified)
Mountain Dog	Mountain Dog (Unspecified)
Pyrenean Mountain Dog	Moutain Dog (Unspecified)
Mudhol Hound	Mudhol Hound
Munsterlander	Munsterlander
Munsterlander Large Pointer	Munsterlander
Newfoundland	Newfoundland
Norfolk Terrier	Norfolk Terrier
Norwich Terrier	Norwich Terrier
Nova Scotia Duck Tolling Retriever	Nova Scotia Duck Tolling Retriever
Old English Sheepdog	Old English Sheepdog
Olde English Bulldogge	Olde English Bulldogge
Alaskan Klee Kai	Alaskan Klee Kai
Cyprus Hunting Dog	Cyprus Hunting Dog
Dutch Ratter	Dutch Ratter
Italian Hound	Italian Hound
Laika	Laika
Large Spanish Hound	Large Spanish Hound
Russo-European Laika	Russo-European Laika
Schipperke	Schipperke
Simaku	Simaku
Small Spanish Hound	Small Spanish Hound
Tahltan Bear Dog	Tahltan Bear Dog
Wirehaired Terrier	Wirehaired Terrier
Otterhound	Otterhound
Papillon	Papillon
Parson Russell Terrier	Parson Russell Terrier
Patterdale Terrier	Patterdale Terrier
Pekingese	Pekingese
Perro Cimarron	Perro Cimarron
Perro de Presa Canario	Perro de Presa Canario
Pharaoh Hound	Pharaoh Hound
Austrian Pinscher	Pinscher (Unspecified)
Carlin Pinscher	Pinscher (Unspecified)
German Pinscher	Pinscher (Unspecified)
Pinscher	Pinscher (Unspecified)
Standard Doberman Pinscher	Pinscher (Unspecified)
Swiss Short-Haired Pinscher	Pinscher (Unspecified)
Plummer Terrier	Plummer Terrier
Podenco	Podengo (Unspecified)
Podenco Canario	Podengo (Unspecified)
Portuguese Podengo	Podengo (Unspecified)
Small Portuguese Podengo	Podengo (Unspecified)
Spanish Podenco	Podengo (Unspecified)
Ariege Pointer	Ariege Pointer
Auvergne Pointer	Auvergne Pointer
Belgian Short-Haired Pointer	Belgian Short-Haired Pointer
Brittany Pointer	Brittany Pointer
Danish Chicken Dog	Danish Chicken Dog
English Pointer	English Pointer
Friesian Pointer	Friesian Pointer
German Long-Haired Pointer	German Pointer
German Pointer	German Pointer
German Rough-Haired Pointer	German Pointer
German Short-Haired Pointer	German Pointer
German Wire-Haired Pointer	German Pointer
Pointer	Pointer (Unspecified)
Portuguese Pointer	Portuguese Pointer
Slovakian Rough-Haired Pointer	Slovakian Rough-Haired Pointer
Spanish Pointer	Spanish Pointer
Pomeranian	Pomeranian
Poodle	Poodle (Unspecified)
American Lo-Sze Pugg	Pug
Pug	Pug
Puggle	Puggle
Rat Terrier	Rat Terrier
Prague Ratter	Ratter
Prazsky Krysarik	Ratter
Ratter	Ratter
Curly Coated Retriever	Curly Coated Retriever
Flat Coated Retriever	Flat Coated Retriever
Retriever	Retriever
Rhodesian Ridgeback	Rhodesian Ridgeback
Ridgeback - Unspecified	Rhodesian Ridgeback
Roman Ridgeback	Rhodesian Ridgeback
Rottweiler	Rottweiler
Russell Terrier	Russell Terrier
Russian Bolonka	Russian Bolonka
Saint Bernard	Saint Bernard
Saluki	Saluki
Samoyed	Samoyed
Schnauzer	Schnauzer
Standard Schnauzer	Schnauzer
Scottish Rough Collie	Scottish Collie
Scottish Smooth Collie	Scottish Collie
Scottish Collie	Scottish Collie
Scottish Terrier	Scottish Terrier
Sealyham Terrier	Sealyham Terrier
English Setter	English Setter
Gordon Setter	Gordon Setter
Llewellin Setter	Llewellin Setter
Setter	English Setter
Chinese Shar-Pei	Shar-Pei
Shetland Sheepdog	Shetland Sheepdog
Pooshit	Shih-Poo
Shih-Poo	Shih-Poo
Shih-tzu	Shih-tzu
Sicillian Hound	Sicillian Hound
Silken Windhound	Silken Windhound
Skye Terrier	Skye Terrier
Sloughi	Sloughi
Soft-Coated Wheaten Terrier	Soft-Coated Wheaten Terrier
Blue Picardy Spaniel	Blue Picardy Spaniel
Boykin Spaniel	Boykin Spaniel
Brittany Spaniel	Brittany Spaniel
Clumber Spaniel	Clumber Spaniel
Field Spaniel	Field Spaniel
French Brittany Spaniel	French Brittany Spaniel
Picardy Spaniel	Picardy Spaniel
Russian Spaniel	Russian Spaniel
Spaniel	Spaniel
Sussex Spaniel	Sussex Spaniel
English Springer Spaniel	English Springer Spaniel
Springer Spaniel - Unspecified	English Springer Spaniel
Welsh Springer Spaniel	Welsh Springer Spaniel
Sprocker	Sprocker
Spocker	Crossbreed
Spoodle	Crossbreed
Springadoodle	Crossbreed
Springapoo	Crossbreed
Sproodle	Crossbreed
Stabyhound	Stabyhound
Irish Staffordshire Bull Terrier	Staffordshire Bull Terrier
Staffordshire Bull Terrier	Staffordshire Bull Terrier
American Staffordshire Terrier	Staffordshire Bull Terrier
Standard Dachshund	Standard Dachshund
Standard Long-Haired Dachshund	Standard Dachshund
Standard Smooth-Haired Dachshund	Standard Dachshund
Standard Wire-Haired Dachshund	Standard Dachshund
Standard Poodle	Standard Poodle
East Siberian Laika	East Siberian Laika
Eurasier	Eurasier
Finnish Spitz	Finnish Spitz
German Spitz	German Spitz
Italian Spitz	Italian Spitz
Japanese Spitz	Japanese Spitz
Nordic Spitz	Nordic Spitz
Norwegian Elkhound	Norwegian Elkhound
Spitz	Spitz (Unspecified)
Standard German Spitz	Standard German Spitz
Thai Bangkaew Dog	Thai Bangkaew Dog
Swedish Lapphund	Swedish Lapphund
Teacup Chihuahua	Teacup Chihuahua
Teacup Maltese	Teacup Maltese
Teacup Pomeranian	Teacup Pomeranian
Teacup Poodle	Teacup Poodle
Teacup Toy Terrier	Teacup Toy Terrier
Teacup Yorkshire Terrier	Teacup Yorkshire Terrier
Teddy Roosevelt Terrier	Teddy Roosevelt Terrier
Terrier	Terrier (Unspecified)
Thai Ridgeback	Thai Ridgeback
Tiara Teddy Bear	Tiara Teddy Bear
Tibetan Kyi Apso	Tibetan Kyi Apso
Tibetan Spaniel	Tibetan Spaniel
Tibetan Terrier	Tibetan Terrier
Titan Terrier	Tibetan Terrier
English Toy Terrier	English Toy Terrier
Moscow Toy Terrier	Moscow Toy Terrier
Rat Toy Terrier	Rat Toy Terrier
Russian Toy Terrier	Russian Toy Terrier
Toy Fox Terrier	Toy Fox Terrier
Toy German Spitz	Toy German Spitz
Toy Manchester Terrier	Toy Manchester Terrier
Toy Terrier	Toy Terrier
Old Format Toy Poodle	Old Format Toy Poodle
Toy Poodle	Toy Poodle
Turkish Kangal	Turkish Kangal
Australian Sheepdog	Australian Sheepdog
Basque Sheepdog	Basque Sheepdog
Bulgarian Sheepdog	Bulgarian Sheepdog
Carpathian Sheepdog	Carpathian Sheepdog
Catalan Sheepdog	Catalan Sheepdog
Caucasian Sheepdog	Caucasian Sheepdog
Central Asian Sheepdog	Central Asian Sheepdog
Croatian Sheepdog	Croatian Sheepdog
Dutch Sheepdog	Dutch Sheepdog
French Sheepdog	French Sheepdog
Himalayan Sheepdog	Himalayan Sheepdog
Icelandic Sheepdog	Icelandic Sheepdog
Maremma Sheepdog	Maremma Sheepdog
New Zealand Sheepdog	New Zealand Sheepdog
Norwegian Sheepdog	Norwegian Sheepdog
Polish Lowland Sheepdog	Polish Lowland Sheepdog
Polish Sheepdog	Polish Sheepdog
Portuguese Sheepdog	Portuguese Sheepdog
Romanian Mioritic Sheepdog	Romanian Mioritic Sheepdog
Sheepdog	Sheepdog
South Russian Ovtcharka	South Russian Ovtcharka
South Russian Sheepdog	South Russian Sheepdog
Spanish Sheepdog	Spanish Sheepdog
Welsh Sheepdog	Welsh Sheepdog
Working sheepdog	Working sheepdog
Alaskan Shepherd Dog	Alaskan Shepherd Dog
Algerian Shepherd Dog	Algerian Shepherd Dog
American Tundra Shepherd Dog	American Tundra Shepherd Dog
American White Shepherd Dog	American White Shepherd Dog
Anatolian Karabash Shepherd Dog	Anatolian Karabash Shepherd Dog
Beauce Shepherd Dog	Beauce Shepherd Dog
Bedouin Shepherd Dog	Bedouin Shepherd Dog
Belgian Laekenois Shepherd Dog	Belgian Laekenois Shepherd Dog
Bergamasco Shepherd Dog	Bergamasco Shepherd Dog
Dutch Shepherd Dog	Dutch Shepherd Dog
East-European Shepherd Dog	East-European Shepherd Dog
English Shepherd Dog	English Shepherd Dog
Greek Shepherd	Greek Shepherd
Italian Shepherd Dog	Italian Shepherd Dog
Karst Shepherd Dog	Karst Shepherd Dog
Picardy Shepherd	Picardy Shepherd
Pyrenean Shepherd Dog	Pyrenean Shepherd Dog
Shepherd Dog	Shepherd Dog
Swiss White Shepherd Dog	Swiss White Shepherd Dog
Yugoslavian Shepherd Dog	Yugoslavian Shepherd Dog
Utonagan	Utonagan
Valley Bulldog	Valley Bulldog
Olde Victorian Bulldogge	Victorian Bulldog
Victorian Bulldog	Victorian Bulldog
French Water Dog	French Water Dog
Hungarian Water Dog	Hungarian Water Dog
Portuguese Water Dog	Portuguese Water Dog
Spanish Water Dog	Spanish Water Dog
Water Dog	Water Dog
American Water Spaniel	American Water Spaniel
Irish Water Spaniel	Irish Water Spaniel
Water Spaniel	Water Spaniel
Weimaraner	Weimaraner
Cardigan Welsh Corgi	Welsh Corgi
Pembroke Welsh Corgi	Welsh Corgi
Welsh Corgi	Welsh Corgi
Welsh Terrier	Welsh Terrier
West Highland White Terrier	West Highland White Terrier
Whippet	Whippet
Czechoslovakian Wolfdog	Wolfdog
British Wolfdog	Wolfdog
Wolfdog	Wolfdog
Irish Wolfhound	Irish Wolfhound
Saarloos Wolfhound	Saarloos Wolfhound
Scottish Deerhound	Scottish Deerhound
Wolfhound	Irish Wolfhound
Yorkshire Terrier	Yorkshire Terrier

## Sheet: S2 >1 case Model
Univariate							Multivariate
Category	Case No (%)	Non-case No (%)	OR	CI	P-value		Model No	Variables	Category	OR	CI	P-value
Crossbred	370 (21.1)	245889 (27.2)	Base				1	Purebred	Crossbred	Base
Purebred	1359 (77.4)	655266 (72.4)	1.38	1.23 - 1.55	<0.001				Purebred	1.25	1.11 - 1.41	<0.001
Purebred Unrecorded	27 ( 1.5)	4056 ( 0.4)	4.42	2.99 - 6.55	<0.001				Unrecorded	0.48	0.31 - 0.74	0.001
Crossbreed	300 (17.1)	197549 (21.8)	Base					Sex_Neuter	Female_Entire	Base
Rhodesian Ridgeback	29 ( 1.7)	1495 ( 0.2)	12.77	8.7 - 18.76	<0.001				Female_Neutered	8.05	5.85 - 11.07	<0.001
Rottweiler	139 ( 7.9)	7223 ( 0.8)	12.67	10.35 - 15.52	<0.001				Male_Entire	1.19	0.8 - 1.77	0.392
Greyhound (Unspecified)	103 ( 5.9)	5511 ( 0.6)	12.31	9.82 - 15.42	<0.001				Male_Neutered	9.22	6.71 - 12.66	<0.001
Great Dane	19 ( 1.1)	1258 ( 0.1)	9.95	6.23 - 15.86	<0.001				Sex Neuter Unrecorded	1204.61	870.29 - 1667.35	<0.001
German Pointer	21 ( 1.2)	1578 ( 0.2)	8.76	5.61 - 13.68	<0.001			Age (Y)	<3	Base
Mastiff (Unspecified)	35 ( 2.0)	3096 ( 0.3)	7.44	5.24 - 10.58	<0.001				>12	10.88	8.43 - 14.05	<0.001
Pinscher (Unspecified)	29 ( 1.7)	2566 ( 0.3)	7.44	5.07 - 10.92	<0.001				3 to <6	4.4	3.43 - 5.65	<0.001
Lurcher	53 ( 3.0)	6016 ( 0.7)	5.8	4.33 - 7.78	<0.001				6 to <9	17.09	13.62 - 21.44	<0.001
Breed not recorded	27 ( 1.5)	4061 ( 0.4)	4.38	2.95 - 6.5	<0.001				9 to <12	24.02	19.12 - 30.17	<0.001
Golden Retriever	65 ( 3.7)	9785 ( 1.1)	4.37	3.34 - 5.72	<0.001				Unrecorded	2.82	2.08 - 3.83	<0.001
Collie (Unspecified)	13 ( 0.7)	1992 ( 0.2)	4.3	2.46 - 7.5	<0.001
Fox Terrier	5 ( 0.3)	1013 ( 0.1)	3.25	1.34 - 7.88	0.009		2	KC Breed Group	Toy	Base
Weimaraner	11 ( 0.6)	2414 ( 0.3)	3	1.64 - 5.48	<0.001				Gundog	14.48	9.72 - 21.58	<0.001
Standard Poodle	5 ( 0.3)	1128 ( 0.1)	2.92	1.2 - 7.08	0.018				Hound	21.54	14.14 - 32.81	<0.001
Labrador Retriever	260 (14.8)	59925 ( 6.6)	2.86	2.42 - 3.37	<0.001				Not_KC_Recognised	7.1	4.75 - 10.59	<0.001
Akita (Unspecified)	8 ( 0.5)	2037 ( 0.2)	2.59	1.28 - 5.23	0.008				Pastoral	11.22	7.33 - 17.15	<0.001
Poodle (Unspecified)	4 ( 0.2)	1050 ( 0.1)	2.51	0.93 - 6.74	0.068				Terrier	3.87	2.54 - 5.9	<0.001
Boxer	35 ( 2.0)	9438 ( 1.0)	2.44	1.72 - 3.47	<0.001				Unrecorded	27.39	18.24 - 41.13	<0.001
Scottish Terrier	5 ( 0.3)	1455 ( 0.2)	2.26	0.93 - 5.48	0.071				Utility	2.42	1.49 - 3.94	<0.001
German Shepherd Dog	65 ( 3.7)	21360 ( 2.4)	2	1.53 - 2.62	<0.001			Sex_Neuter	Female_Entire	Base
Tibetan Terrier	5 ( 0.3)	1870 ( 0.2)	1.76	0.73 - 4.27	0.21				Female_Neutered	7.78	5.65 - 10.7	<0.001
American Bulldog	8 ( 0.5)	3225 ( 0.4)	1.63	0.81 - 3.3	0.171				Male_Entire	1.16	0.78 - 1.73	0.466
Cairn Terrier	6 ( 0.3)	2470 ( 0.3)	1.6	0.71 - 3.59	0.255				Male_Neutered	9.02	6.57 - 12.4	<0.001
Hungarian Vizsla	5 ( 0.3)	2052 ( 0.2)	1.6	0.66 - 3.89	0.295				Sex Neuter Unrecorded	1040.31	750 - 1443	<0.001
Dogue de Bordeaux	7 ( 0.4)	3030 ( 0.3)	1.52	0.72 - 3.22	0.273			Age (Y)	<3	Base
Labradoodle	17 ( 1.0)	7595 ( 0.8)	1.47	0.9 - 2.4	0.12				>12	10.36	7.99 - 13.43	<0.001
Alaskan Malamute	4 ( 0.2)	1915 ( 0.2)	1.38	0.51 - 3.69	0.527				3 to <6	3.95	3.06 - 5.08	<0.001
Other Purebred	208 (11.8)	109051 (12.0)	1.26	1.05 - 1.5	0.012				6 to <9	14.98	11.9 - 18.85	<0.001
Dalmatian	5 ( 0.3)	2720 ( 0.3)	1.21	0.5 - 2.93	0.672				9 to <12	21.16	16.79 - 26.66	<0.001
Scottish Collie	2 ( 0.1)	1283 ( 0.1)	1.03	0.26 - 4.13	0.971				Unrecorded	1.35	0.99 - 1.83	0.059
English Springer Spaniel	30 ( 1.7)	20198 ( 2.2)	0.98	0.67 - 1.42	0.908
Whippet	7 ( 0.4)	4684 ( 0.5)	0.98	0.46 - 2.08	0.967		3	Dachshund Status	Non-dachshund-type	Base
Bedlington Terrier	2 ( 0.1)	1369 ( 0.2)	0.96	0.24 - 3.87	0.956				Dachshund-type	0.15	0.05 - 0.46	0.001
Border Collie	29 ( 1.7)	22403 ( 2.5)	0.85	0.58 - 1.25	0.412				Unrecorded	0.7	0.61 - 0.79	<0.001
Bulldog (Unspecified)	4 ( 0.2)	3232 ( 0.4)	0.81	0.3 - 2.19	0.685			Sex_Neuter	Female_Entire	Base
Staffordshire Bull Terrier	63 ( 3.6)	53934 ( 6.0)	0.77	0.59 - 1.01	0.058				Female_Neutered	8.07	5.87 - 11.11	<0.001
West Highland White Terrier	20 ( 1.1)	18875 ( 2.1)	0.7	0.44 - 1.1	0.119				Male_Entire	1.19	0.8 - 1.77	0.396
Cocker Spaniel	25 ( 1.4)	33075 ( 3.7)	0.5	0.33 - 0.75	0.001				Male_Neutered	9.25	6.74 - 12.71	<0.001
Beagle	6 ( 0.3)	8070 ( 0.9)	0.49	0.22 - 1.1	0.083				Sex Neuter Unrecorded	1175.75	849.59 - 1627.13	<0.001
Jack Russell Terrier	33 ( 1.9)	48569 ( 5.4)	0.45	0.31 - 0.64	<0.001			Age (Y)	<3	Base
Border Terrier	6 ( 0.3)	9651 ( 1.1)	0.41	0.18 - 0.92	0.03				>12	11.03	8.55 - 14.24	<0.001
Bichon Frise	7 ( 0.4)	13268 ( 1.5)	0.35	0.16 - 0.74	0.006				3 to <6	4.43	3.45 - 5.69	<0.001
Husky	4 ( 0.2)	8524 ( 0.9)	0.31	0.12 - 0.83	0.02				6 to <9	17.21	13.72 - 21.6	<0.001
Cavalier King Charles Spaniel	7 ( 0.4)	17257 ( 1.9)	0.27	0.13 - 0.57	0.001				9 to <12	24.24	19.3 - 30.44	<0.001
Miniature Dachshund	2 ( 0.1)	4827 ( 0.5)	0.27	0.07 - 1.1	0.067				Unrecorded	2.56	1.9 - 3.45	<0.001
Miniature Schnauzer	3 ( 0.2)	8396 ( 0.9)	0.24	0.08 - 0.73	0.013
French Bulldog	4 ( 0.2)	16397 ( 1.8)	0.16	0.06 - 0.43	<0.001		4	Spaniel Status	Non-spaniel-type	0	0 - 0	<0.001
Pug	2 ( 0.1)	16218 ( 1.8)	0.08	0.02 - 0.33	<0.001				Spaniel-type	0.37	0.29 - 0.47	<0.001
Yorkshire Terrier	2 ( 0.1)	28177 ( 3.1)	0.05	0.01 - 0.19	<0.001				Unrecorded	0.65	0.57 - 0.74	<0.001
Chihuahua	2 ( 0.1)	36794 ( 4.1)	0.04	0.01 - 0.14	<0.001			Sex_Neuter	Female_Entire	Base
Cockapoo	NA ( NA)	18260 ( 2.0)	0	0 - 3.75979847671656e+105	0.915				Female_Neutered	8.1	5.89 - 11.15	<0.001
Cavapoo	NA ( NA)	4060 ( 0.4)	0	0 - 5.6066069656618e+230	0.96				Male_Entire	1.19	0.8 - 1.78	0.384
Cavachon	NA ( NA)	3535 ( 0.4)	0	0 - 5.355853053175e+247	0.962				Male_Neutered	9.29	6.77 - 12.76	<0.001
Shar-Pei	NA ( NA)	3647 ( 0.4)	0	0 - 6.31923441360089e+243	0.962				Unrecorded	1175.86	849.57 - 1627.46	<0.001
Sprocker	NA ( NA)	3338 ( 0.4)	0	0 - 1.29415153172268e+255	0.963			Age (Y)	<3	Base
Maltese	NA ( NA)	3248 ( 0.4)	0	0 - 5.08700196317526e+258	0.964				>12	11.18	8.66 - 14.44	<0.001
King Charles Spaniel	NA ( NA)	2813 ( 0.3)	0	0 - 2.79551895282976e+278	0.966				3 to <6	4.43	3.45 - 5.69	<0.001
Miniature Poodle	NA ( NA)	2415 ( 0.3)	0	0 - 1.00191849144712e+301	0.969				6 to <9	17.48	13.93 - 21.94	<0.001
Jug	NA ( NA)	1967 ( 0.2)	0	0 - Inf	0.972				9 to <12	24.75	19.7 - 31.08	<0.001
Boston Terrier	NA ( NA)	1799 ( 0.2)	0	0 - Inf	0.973				Unrecorded	2.55	1.89 - 3.44	<0.001
Dachshund (Unspecified)	NA ( NA)	1692 ( 0.2)	0	0 - Inf	0.974
Miniature Yorkshire Terrier	NA ( NA)	1560 ( 0.2)	0	0 - Inf	0.975		5	Skull-shape	Mesocephalic	Base
Jackapoo	NA ( NA)	1362 ( 0.2)	0	0 - Inf	0.977				Brachycephalic	0.39	0.32 - 0.48	<0.001
Puggle	NA ( NA)	1173 ( 0.1)	0	0 - Inf	0.978				Dolichocephalic	1.92	1.68 - 2.19	<0.001
Goldendoodle	NA ( NA)	1128 ( 0.1)	0	0 - Inf	0.979				Unrecorded	0.68	0.6 - 0.78	<0.001
Standard Dachshund	NA ( NA)	1133 ( 0.1)	0	0 - Inf	0.979			Sex_Neuter	Female_Entire	Base
Chow Chow	NA ( NA)	1002 ( 0.1)	0	0 - Inf	0.98				Female_Neutered	7.94	5.77 - 10.92	<0.001
Toy	26 ( 1.5)	131897 (14.6)	Base						Male_Entire	1.19	0.8 - 1.77	0.403
Gundog	484 (27.6)	135606 (15.0)	18.11	12.2 - 26.87	<0.001				Male_Neutered	9.19	6.69 - 12.62	<0.001
Hound	164 ( 9.3)	31364 ( 3.5)	26.53	17.54 - 40.13	<0.001				Unrecorded	1152.01	832.09 - 1594.92	<0.001
Not KC Recognised	390 (22.2)	263616 (29.1)	7.51	5.05 - 11.16	<0.001			Age (Y)	<3	Base
Pastoral	144 ( 8.2)	51675 ( 5.7)	14.14	9.31 - 21.47	<0.001				>12	9.42	7.29 - 12.17	<0.001
Terrier	153 ( 8.7)	145828 (16.1)	5.32	3.51 - 8.07	<0.001				3 to <6	4.03	3.13 - 5.17	<0.001
Utility	46 ( 2.6)	102627 (11.3)	2.27	1.41 - 3.68	0.001				6 to <9	15.1	12.03 - 18.95	<0.001
<10	89 ( 5.1)	213321 (23.6)	Base						9 to <12	20.72	16.49 - 26.03	<0.001
>40	231 (13.2)	26178 ( 2.9)	21.15	16.56 - 27.02	<0.001				Unrecorded	2.36	1.74 - 3.18	<0.001
10-19.9	435 (24.8)	167774 (18.5)	6.21	4.95 - 7.81	<0.001
20-29.9	392 (22.3)	117620 (13.0)	7.99	6.35 - 10.06	<0.001		6	Chondrodystrophy Status	Non-chondrodystrophic	Base
30-39.9	522 (29.7)	69856 ( 7.7)	17.91	14.3 - 22.43	<0.001				Chondystrophic	0.13	0.11 - 0.16	<0.001
Bodymass Unrecorded	87 ( 5.0)	310462 (34.3)	0.67	0.5 - 0.9	0.008				Unrecorded	0.4	0.36 - 0.45	<0.001
<3	101 ( 5.8)	329270 (36.4)	Base					Sex_Neuter	Female_Entire	Base
>12	188 (10.7)	69726 ( 7.7)	8.79	6.9 - 11.2	<0.001				Female_Neutered	7.84	5.7 - 10.79	<0.001
3 to <6	204 (11.6)	223344 (24.7)	2.98	2.35 - 3.78	<0.001				Male_Entire	1.15	0.77 - 1.72	0.483
6 to <9	589 (33.5)	162000 (17.9)	11.85	9.6 - 14.64	<0.001				Male_Neutered	9.36	6.81 - 12.86	<0.001
9 to <12	589 (33.5)	108448 (12.0)	17.71	14.34 - 21.87	<0.001				Unrecorded	1162.05	838.15 - 1611.12	<0.001
Age Unrecorded	85 ( 4.8)	12423 ( 1.4)	22.31	16.71 - 29.78	<0.001			Age (Y)	<3	Base
Female Entire	41 ( 2.3)	233772 (25.8)	Base						>12	9.92	7.66 - 12.83	<0.001
Female Neutered	507 (28.9)	197768 (21.8)	14.62	10.63 - 20.1	<0.001				3 to <6	4.03	3.13 - 5.19	<0.001
Male Entire	59 ( 3.4)	259460 (28.7)	1.3	0.87 - 1.93	0.202				6 to <9	14.97	11.91 - 18.83	<0.001
Male Neutered	574 (32.7)	209982 (23.2)	15.59	11.35 - 21.4	<0.001				9 to <12	20.51	16.29 - 25.81	<0.001
Sex Unrecorded	575 (32.7)	4229 ( 0.5)	775.24	563.91 - 1065.77	<0.001				Unrecorded	2.28	1.68 - 3.08	<0.001
Non-Dachshund-type	1426 (81.2)	696999 (77.0)	Base
Dachshund-type	3 ( 0.2)	10288 ( 1.1)	0.14	0.05 - 0.44	0.001		7	Bodymass(Kg)	<10	Base
Dachshund Status Unrecorded	327 (18.6)	197924 (21.9)	0.81	0.72 - 0.91	<0.001				>40	18.07	13.87 - 23.53	<0.001
Non-Spaniel-type	1360 (77.4)	630349 (69.6)	Base						10-19.9	5.91	4.66 - 7.5	<0.001
Spaniel-type	69 ( 3.9)	76938 ( 8.5)	0.42	0.33 - 0.53	<0.001				20-29.9	7.31	5.75 - 9.3	<0.001
Spaniel Status Unrecorded	327 (18.6)	197924 (21.9)	0.77	0.68 - 0.86	<0.001				30-39.9	15.82	12.49 - 20.05	<0.001
Non-Chondrodystriphic	1165 (66.3)	290490 (32.1)	Base						Unrecorded	0.15	0.1 - 0.22	<0.001
Chondrodystrophic	165 ( 9.4)	331858 (36.7)	0.12	0.11 - 0.15	<0.001			Sex_Neuter	Female_Entire	Base
Chondrodystrophy Unrecorded	426 (24.3)	282863 (31.2)	0.38	0.34 - 0.42	<0.001				Female_Neutered	7.24	5.26 - 9.96	<0.001
Mesocephalic	982 (55.9)	452296 (50.0)	Base						Male_Entire	0.94	0.63 - 1.4	0.763
Brachycephalic	106 ( 6.0)	166883 (18.4)	0.29	0.24 - 0.36	<0.001				Male_Neutered	6.99	5.09 - 9.61	<0.001
Dolichocephalic	341 (19.4)	75770 ( 8.4)	2.07	1.83 - 2.35	<0.001				Unrecorded	1860.29	1330.2 - 2601.62	<0.001
Skull Shape Unrecorded	327 (18.6)	210262 (23.2)	0.72	0.63 - 0.81	<0.001			Age (Y)	<3	Base
									>12	3.93	3.02 - 5.11	<0.001
									3 to <6	1.22	0.95 - 1.59	0.124
									6 to <9	4.53	3.59 - 5.72	<0.001
									9 to <12	6.43	5.09 - 8.12	<0.001
									Unrecorded	8.24	5.52 - 12.31	<0.001

## Sheet: S3 Chondrodystrophy
Chondrodystrophic Breeds
Affenpinscher
American Cocker Spaniel
Australian Miniature Shepherd Dog
Basset Griffon Vendeen
Basset Hound
Bavarian Mountain Hound
Beagle
Bichon Frise
Bleu de Gascogne Basset
Bolognese Bichon
Cairn Terrier
Cavalier King Charles Spaniel
Chesapeake Bay Retriever
Chihuahua
Chinese Crested
Clumber Spaniel
Cocker Spaniel
Coton De Tulear
Dachsbracke
Dachshund (Unspecified)
Dandie Dinmont Terrier
English Springer Spaniel
Fauve de Bretagne Basset
French Basset
French Bulldog
Glen of Imaal Terrier
Grand Basset Griffon Vendeen
Havanese
Jack Russell Terrier
Japanese Chin
King Charles Spaniel
Lhasa Apso
Maltese
Miniature Dachshund
Miniature Doberman Pinscher
Miniature Jack Russell Terrier
Miniature Poodle
Miniature Shih-Tzu
Miniature Yorkshire Terrier
Norwich Terrier
Nova Scotia Duck Tolling Retriever
Old Format Toy Poodle
Papillon
Parson Russell Terrier
Pekingese
Petit Basset Griffon Vendeen
Podengo (Unspecified)
Poodle (Unspecified)
Pug
Rat Toy Terrier
Scottish Terrier
Sealyham Terrier
Shar-Pei
Shih-tzu
Skye Terrier
Spaniel
Standard Dachshund
Teacup Maltese
Teacup Poodle
Teacup Yorkshire Terrier
Tibetan Spaniel
Toy Poodle
Welsh Corgi
West Highland White Terrier
Yorkshire Terrier

## Sheet: S4 VIF Scores and AUC
VIF scores in final breed model
Variable	GVIF	Df	GVIF^(1/(2*Df))
Breed	1.22	60	1
Sex_Neuter	1.39	4	1.04
Age	1.49	5	1.04
ROC curves for all multivariate models
Variable	ROC AUC
Breed	0.912
Purebred	0.877
KC Group	0.909
Dachshund Status	0.879
Spaniel Status	0.882
Skull Shape	0.885
Chondrodystrophy	0.904
Bodymass	0.928
